# Supplementary material for: Anatomical distribution and treatment for fractures and dislocations of the proximal and middle phalanges: a multicentre snapshot study of 461 patients
Source: Research Square preprint supplement (doi:10.21203/rs.3.rs-7544817/v1), 2025-10-03
Supplement: Supplementary file 1 [file 2d1605c5c84ecd0f9610a9b2.docx]

| **Supplementary Table 1C**  A comparison of injury characteristics between functional treatment and immobilisation for dorsal PIPJ dislocations. | | | |
| --- | --- | --- | --- |
|  | **Functional treatment** N = 39 | **Immobilisation** N = 18 | ***p*-value***1* |
| Median age in years (IQR) | 51 (28, 63) | 53 (24, 60) | 0.9 |
| Gender – male | 24 (62%) | 16 (89%) | **0.36** |
| Affected digit |  |  | 0.078 |
| 2 | 4 (10%) | 3 (17%) |  |
| 3 | 5 (13%) | 7 (39%) |  |
| 4 | 8 (21%) | 1 (5.6%) |  |
| 5 | 22 (56%) | 7 (39%) |  |
| Fracture reduction | 38 (97%) | 16 (89%) | 0.2 |
| Fracture reduction successful | 38 (100%) | 15 (94%) | 0.3 |
| Unknown | 1 | 2 |  |
| *1* Fisher’s exact test. PIPJ = proximal interphalangeal joint | | |
