# Supplementary material for: Anatomical distribution and treatment for fractures and dislocations of the proximal and middle phalanges: a multicentre snapshot study of 461 patients
Source: Research Square preprint supplement (doi:10.21203/rs.3.rs-7544817/v1), 2025-10-03
Supplement: Supplementary file 2 [file 813597b267c667a4be7d964d.docx]

| **Supplementary Table 1A**  A comparison of injury characteristics between functional  treatment and immobilization for PIPJ palmar plate avulsion fractures. | | | |
| --- | --- | --- | --- |
|  | **Functional treatment** N = 96 | **Immobilization** N = 41 | ***p*-value***1* |
| Median age in years (IQR) | 32 (24, 47) | 31 (26, 43) | 0.5 |
| Gender – male | 46 (48%) | 22 (53%) | 0.5 |
| Affected digit |  |  | **0.049** |
| 2 | 11 (11%) | 7 (17%) |  |
| 3 | 29 (30%) | 8 (20%) |  |
| 4 | 23 (24%) | 18 (44%) |  |
| 5 | 33 (34%) | 8 (20%) |  |
| *1*Wilcoxon rank sum test; Pearson’s Chi-squared test. PIPJ = proximal interphalangeal joint. | | | |
