# Supplementary material for: Anatomical distribution and treatment for fractures and dislocations of the proximal and middle phalanges: a multicentre snapshot study of 461 patients
Source: Research Square preprint supplement (doi:10.21203/rs.3.rs-7544817/v1), 2025-10-03
Supplement: Supplementary file 3 [file bfab6b617d62b948c57037a3.docx]

| **Supplementary Table 1B**  A comparison of patient and injury characteristics between functional treatment and immobilisation for P1 shaft fractures. | | | |
| --- | --- | --- | --- |
|  | **Functional treatment**  N = 28 | **Immobilization**  N = 68 | ***p*-value***1* |
| Median age in years (IQR) | 45 (28, 55) | 47 (30, 64) | 0.3 |
| Gender – male | 15 (54%) | 32 (47%) | 0.6 |
| Affected digit |  |  | **0.024** |
| 2 | 7 (25%0 | 4 (5.9%) |  |
| 3 | 1 (3.6%) | 3 (4.4%) |  |
| 4 | 6 (21%) | 9 (13%) |  |
| 5 | 14 (50%) | 52 (76%) |  |
| Fracture pattern |  |  | 0.6 |
| Proximal metaphyseal | 14 (50%) | 37 (54%) |  |
| Transverse | 3 (11%) | 4 (5.9%) |  |
| Oblique/spiral | 5 (18%) | 16 (24%) |  |
| Multi-fragmentary | 3 (11%) | 8 (12%) |  |
| Distal metaphyseal | 2 (7.1%) | 3 (4.4%) |  |
| Shaft avulsion fracture | 1 (3.6%) | 0 |  |
| Clinically observed angulation | 1 (3.6%) | 14 (21%) | 0.060 |
| Unknown | 0 | 1 |  |
| Clinically observed rotational deformity | 2 (7.1%) | 10 (15%) | 0.5 |
| Unknown | 0 | 2 |  |
| Dislocation on radiograph (>2mm) | 7 (25%) | 31 (46%) | 0.061 |
| Reduction of the fracture | 4 (14%) | 24 (35%) | **0.040** |
| Successful reduction | 3 (75%) | 20 (91%) | 0.4 |
| Unknown | 24 | 46 |  |
| *1* Fisher’s exact test; Pearson’s Chi-squared test. P1 = proximal phalanx. | | | |
